# Supplementary material
Source: ML conference proceedings conference paper supplement (https://openaccess.thecvf.com/content/CVPR2024/html/Wang_InNeRF360_Text-Guided_3D-Consistent_CVPR_2024_paper.html)
Supplement: Supplementary file 1 [file Wang_InNeRF360_Text-Guided_3D-Consistent_CVPR_2024_supplemental.pdf]

# InNeRF360: Text-Guided 3D-Consistent Object Inpainting on 360° Neural Radiance Fields

## Supplementary Material

Due to a file size limit, we refer interested readers to our project page at <https://ivrl.github.io/InNeRF360/> for the complete supplementary pdf and videos showcasing our results.

The catalog of the discussed items in our full supplementary document can be found below:

### **A. Additional Results**

- 360-degree scenes.
- Ablation on mask dilation.
- Front-facing scenes.

### **B. Dataset Details**

### **C. User Studies on View Consistency**

### **D. Editing Accuracy**

### **E. 2D Inpainting Examples**

### **F. Failure Cases**

### **G. Design Justification on Geometry Guidance**

### **H. Implementation Details.**

- Depth warping refinement.
- Training Inpainted NeRF.
- Implementation details on SPN-360.

### **I. Additional results on segmentation.**

### **J. Acknowledgements**
